# Supplementary material for: Intraperitoneal hypertension, a novel risk factor for sepsis-associated encephalopathy in sepsis mice
Source: PubMed Central journal article supplement (PMC5970176; doi:10.1038/s41598-018-26500-7), 2018-05-25

# **Intraperitoneal hypertension, a novel risk factor for sepsis-associated encephalopathy in sepsis mice**

Yu-jing He<sup>1\*</sup>, Hao Xu<sup>1\*</sup>, Yao-jie Fu<sup>2</sup>, Ji-yan Lin<sup>2</sup>, Min-wei Zhang<sup>1</sup>

<sup>1</sup>Intensive Care Unit, First Affiliated Hospital of Xiamen University, Xiamen, Fujian province, China.

<sup>2</sup>Emergency Department, First Affiliated Hospital of Xiamen University, Xiamen, Fujian province, China.

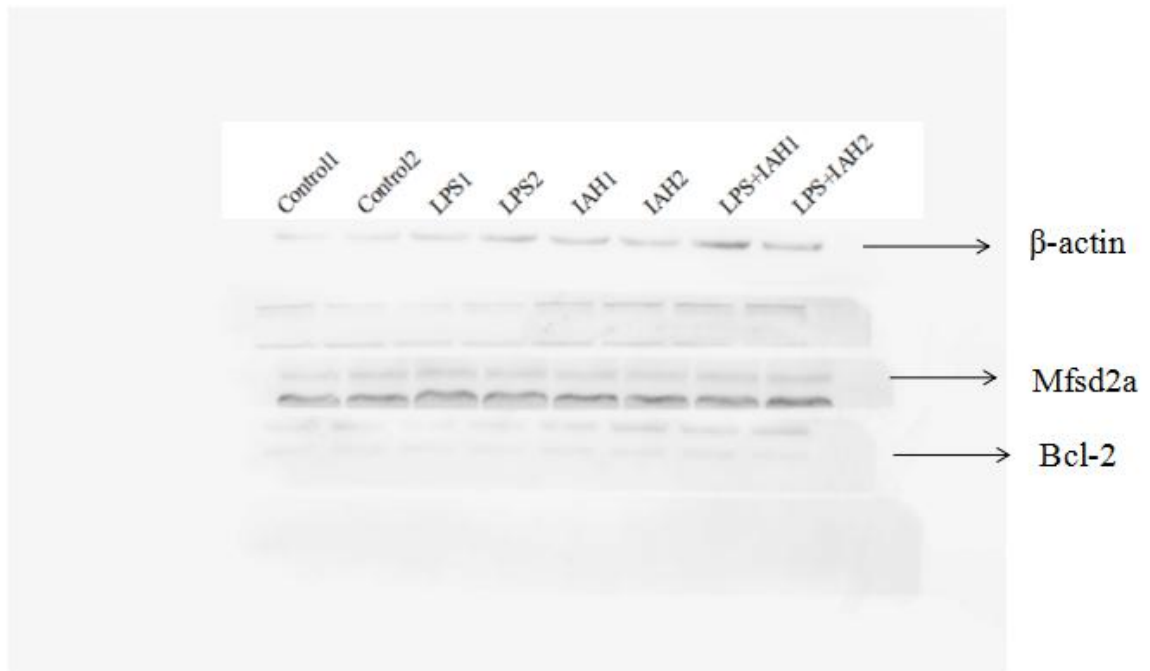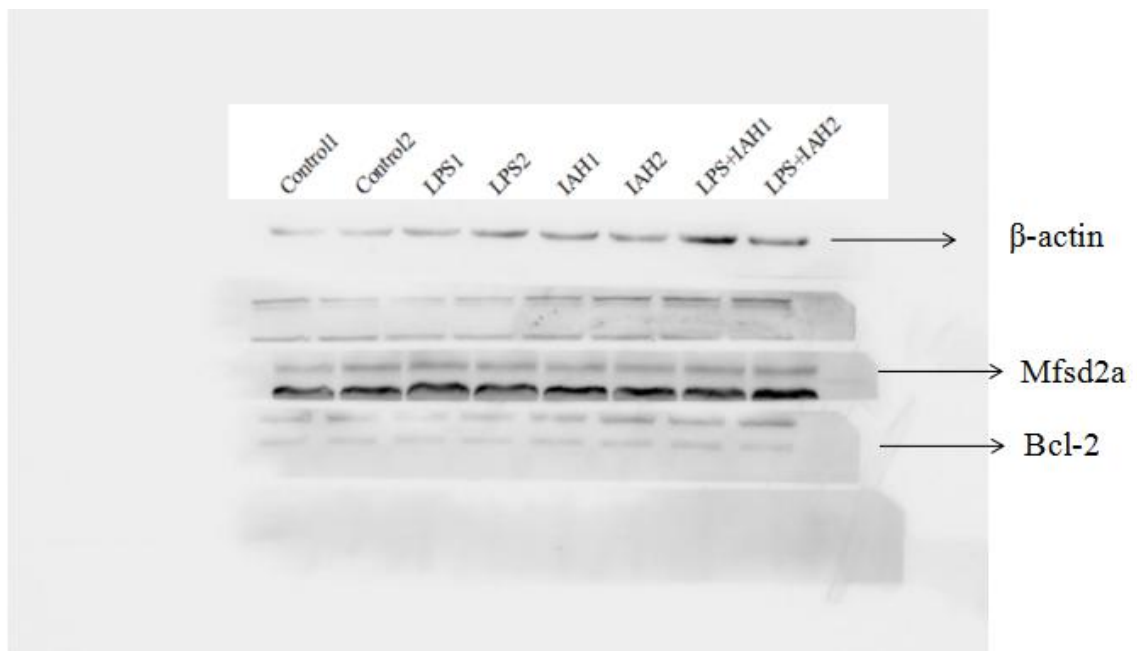

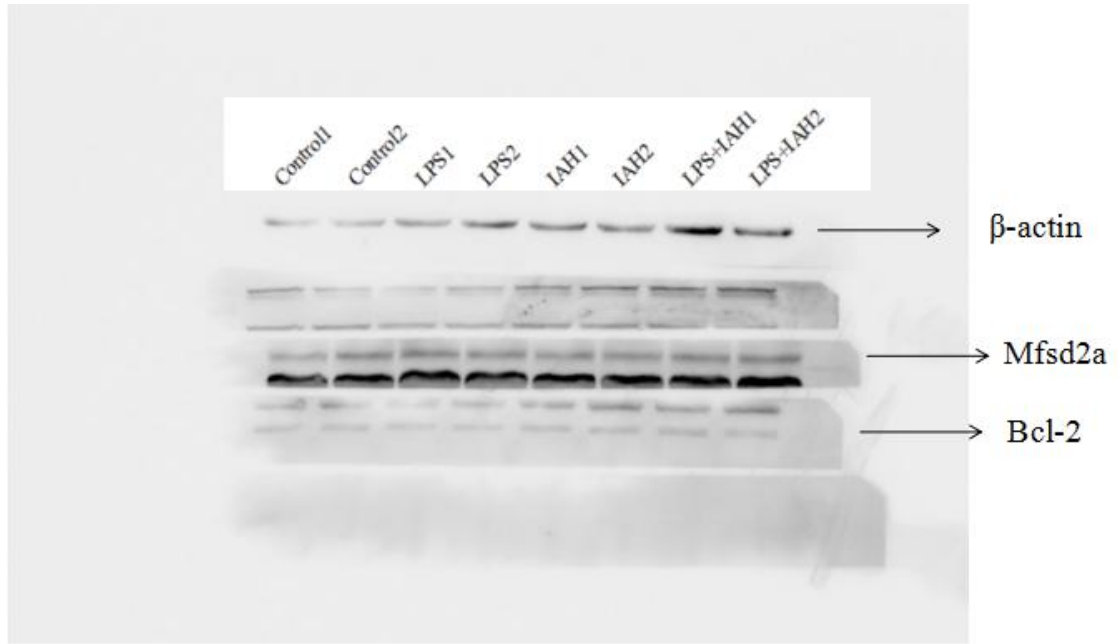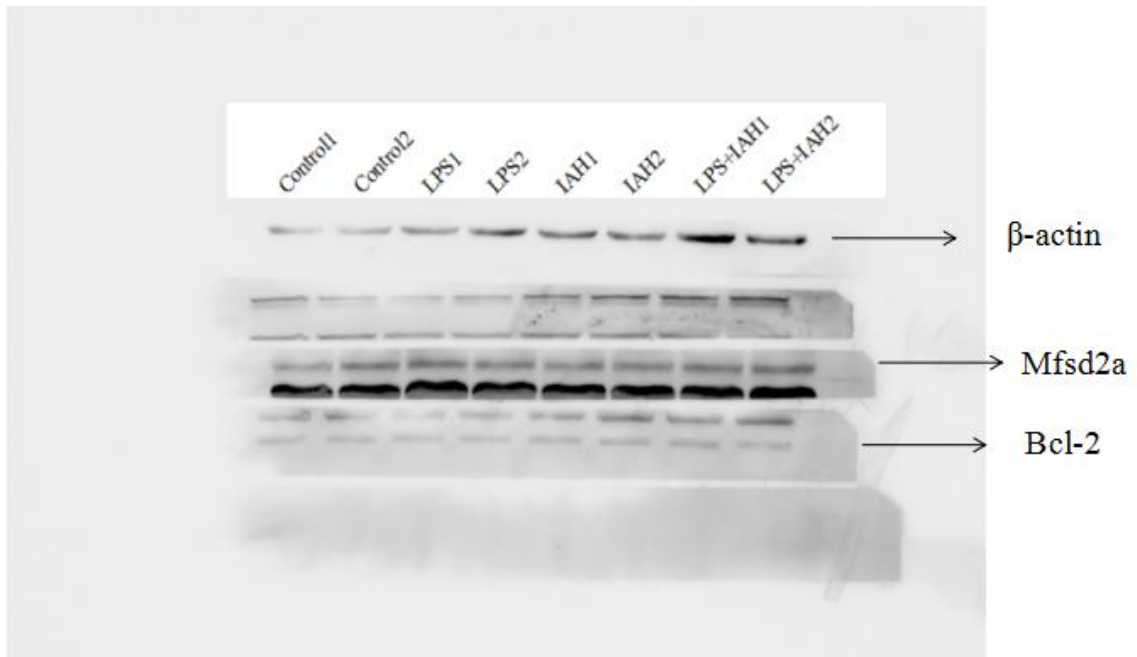

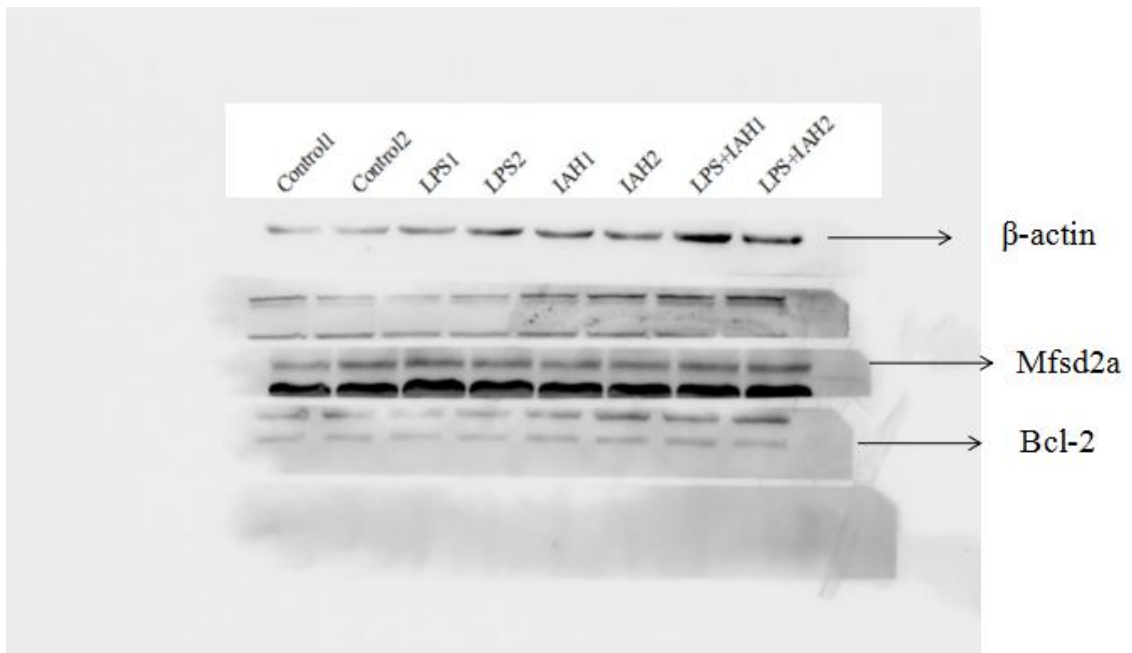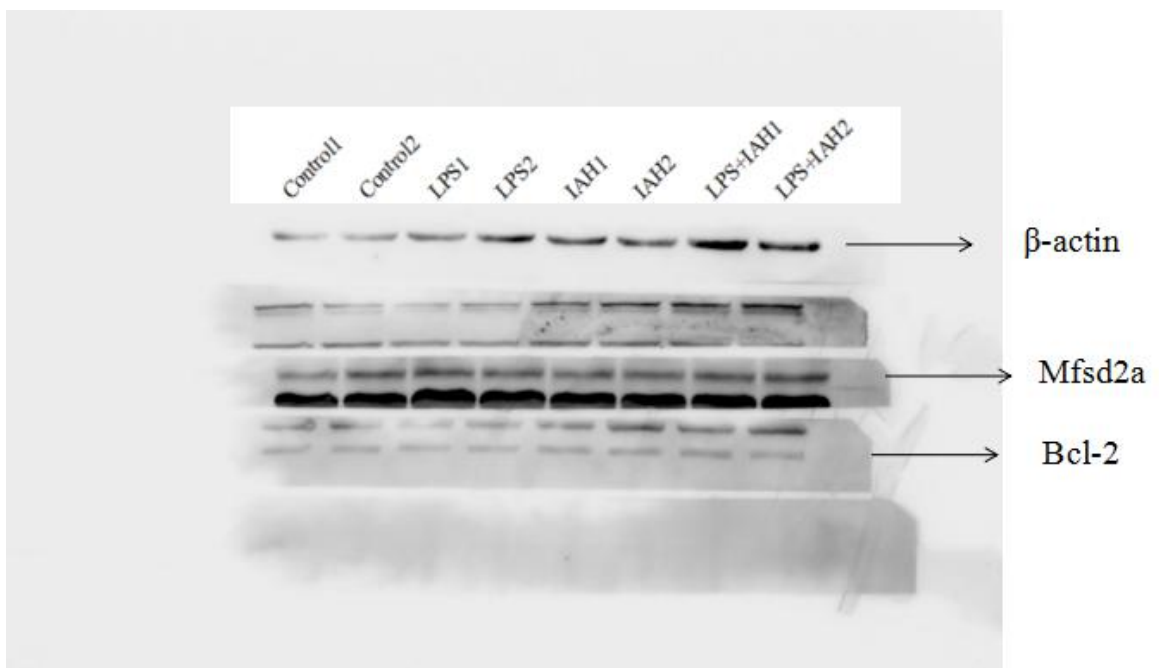

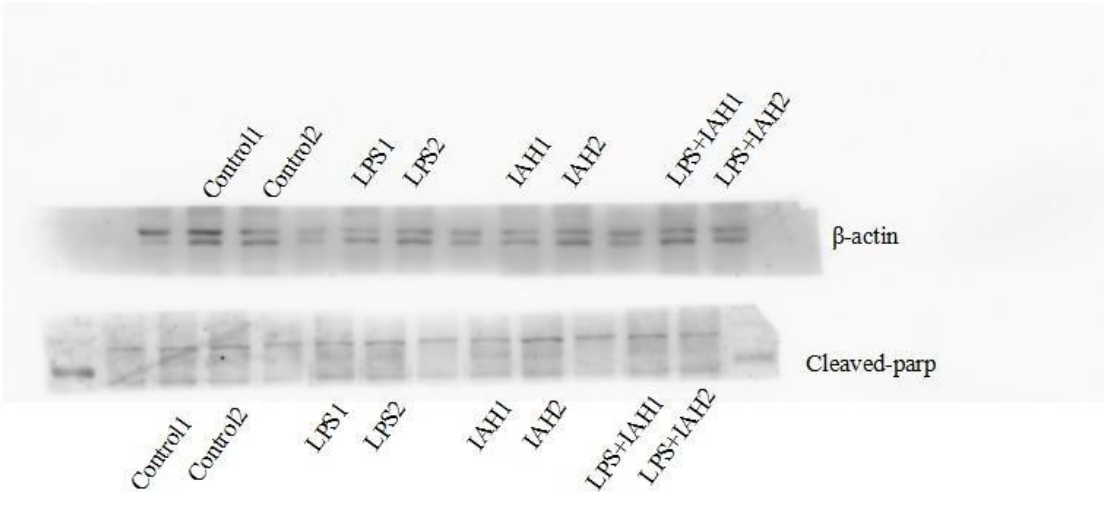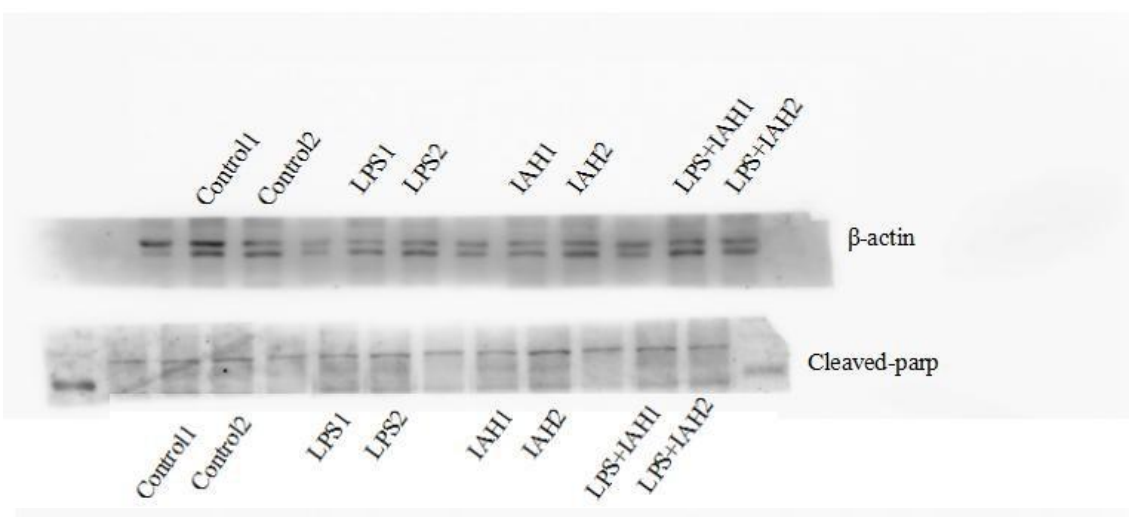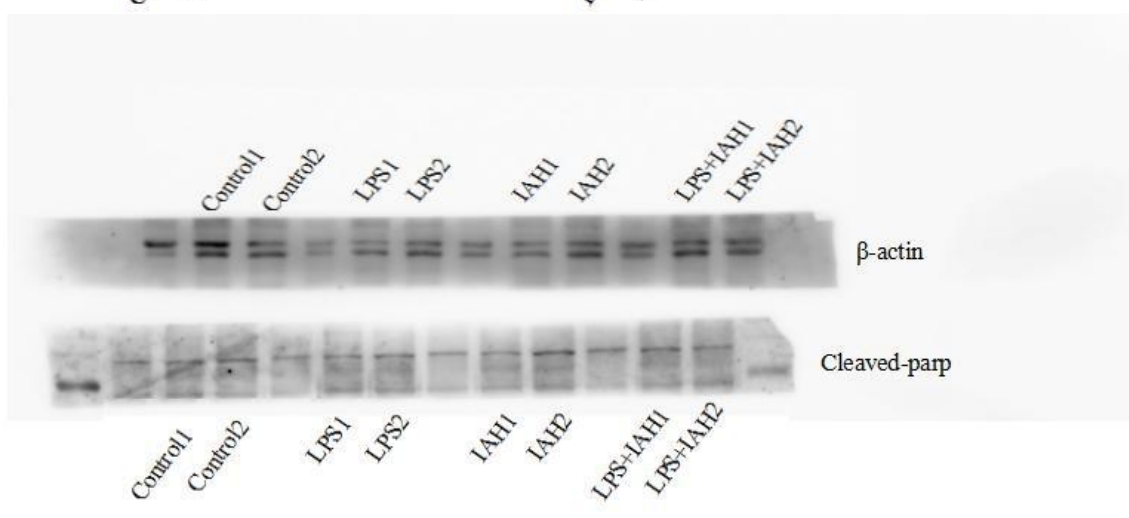

Supplement: 41598_2018_26500_MOESM1_ESM.pdf [file 41598_2018_26500_MOESM1_ESM.pdf]
